# Supplementary material
Source: PubMed Central journal article supplement (PMC1790752)
Supplement: bmj_39041.445104.BE_1.pdf [file bmj_39041.445104.BE_1.pdf]

## **APPENDIX 1 [as supplied by authors]**

### **Operational definition of completed suicide and attempted suicide**

Completed and attempted suicides were identified using approaches, previously described and validated in the GPRD (see MS references 9, 10, 11).

We identified all the Read or OXMIS coding for suicide (see listing in Table 1) in the medical records. Free text notes associated with the suicide records were extracted and anonymized at the MHRA. Two study team members (AR, PT) reviewed the free text; a third reviewer (SW) was responsible for a second independent review in order to finalize identification of all suicide cases (attempted or completed). All reviewers were blind to exposure. When there was disagreement, individual cases were discussed and consensus was reached.

When suicide coding was not associated with an administrative record of death, the event was counted as 'attempted suicide'. Suicide cases were considered as 'completed suicides' if these were associated with an administrative record of death within 30 days from the date of the medical record of suicide. This time window was allowed to ensure sufficient time for completing administrative and legal procedures and recording at the general practice.

Additionally, cases of completed suicide were identified by review of free text notes associated with any coding for death (see listing in Table 2).

We adopted a ‘fully inclusive’ approach in selecting coding for both death and suicide to ensure that miscoding did not prevent identification of suicide cases. Review of the free text notes associated with suicide and death coding aimed at optimizing the specificity of outcome identification and minimizing misclassification.

**Table 1. Read and OXMIS terminology and associated coding for the identification of suicides in GPRD**

| <b>Read/OXMIS Code</b> | <b>Read/OXMIS Term</b>                                                                                                    |
|------------------------|---------------------------------------------------------------------------------------------------------------------------|
| U2...14                | [X]Attempted suicide                                                                                                      |
| U20..11                | [X]Deliberate drug overdose / other poisoning                                                                             |
| U30..11                | [X]Deliberate drug poisoning                                                                                              |
| U41..00                | [X]Hanging strangulation + suffocation undetermined intent                                                                |
| U209600                | [X]Int self pois alcohol indust/construct area                                                                            |
| U203600                | [X]Int self pois antiparkinson drug indust/construct area                                                                 |
| U206600                | [X]Int self pois hallucinogen indust/construct area                                                                       |
| U205600                | [X]Int self pois narcotic drug indust/construct area                                                                      |
| U200600                | [X]Int self pois nonopioid analgesic indust/construct area                                                                |
| U20Az00                | [X]Int self pois org solv,halogen hydrocarb, unspec place                                                                 |
| U20Ay00                | [X]Int self pois org solv,halogen hydrocarb,oth spec place                                                                |
| U20A600                | [X]Int self pois org solvent,halogen hydrocarb,indust area                                                                |
| U207600                | [X]Int self pois oth autonomic drug indust/construct area                                                                 |
| U208600                | [X]Int self pois oth/unsp drug/medic indust/construct area                                                                |
| U20B600                | [X]Int self pois other gas/vapour indust/construct area                                                                   |
| U20C600                | [X]Int self pois pesticide indust/construct area                                                                          |
| U204600                | [X]Int self pois psychotropic drug indust/construct area                                                                  |
| U202600                | [X]Int self pois sedative hypnotic indust/construct area                                                                  |
| U20y600                | [X]Int self pois unspecif chemical indust/construct area                                                                  |
| U209300                | [X]Int self poison alcohol in sport/athletic area                                                                         |
| U209y00                | [X]Int self poison alcohol other spec place                                                                               |
| U209200                | [X]Int self poison alcohol school/pub admin area                                                                          |
| U201300                | [X]Int self poison antiepileptic in sport/athletic area                                                                   |
| U201600                | [X]Int self poison antiepileptic indust/construct area                                                                    |
| U203y00                | [X]Int self poison antiparkinson drug other spec place                                                                    |
| U203300                | [X]Int self poison antparkinson drug in sport/athletic area<br>[X]Int self poison antparkinson drug school/pub admin area |
| U203200                | [X]Int self poison antparkinson drug school/pub admin area                                                                |
| U206y00                | [X]Int self poison hallucinogen other spec place                                                                          |
| U206300                | [X]Int self poison hallucinogenin sport/athletic area                                                                     |
| U206200                | [X]Int self poison hallucinogenschool/pub admin area                                                                      |
| U205300                | [X]Int self poison narcotic drug in sport/athletic area                                                                   |
| U205y00                | [X]Int self poison narcotic drug other spec place                                                                         |
| U205200                | [X]Int self poison narcotic drug school/pub admin area                                                                    |
| U200300                | [X]Int self poison nonopioid analges in sport/athletic area                                                               |

|         |                                                             |
|---------|-------------------------------------------------------------|
| U200200 | [X]Int self poison nonopioid analges school/pub admin area  |
| U200y00 | [X]Int self poison nonopioid analgesic other spec place     |
| U20A200 | [X]Int self poison org solvent,halogen hydrocarb, school    |
| U20A400 | [X]Int self poison org solvent,halogen hydrocarb,in highway |
| U20A700 | [X]Int self poison org solvent,halogen hydrocarb,on farm    |
| U20A100 | [X]Int self poison org solvent,halogen hydrocarb,res instit |
| U20A300 | [X]Int self poison org solvent,halogen hydrocarb,sport area |
| U20A500 | [X]Int self poison org solvent,halogen hydrocarb,trade area |
| U207300 | [X]Int self poison oth autonom drug in sport/athletic area  |
| U207200 | [X]Int self poison oth autonom drug school/pub admin area   |
| U207y00 | [X]Int self poison oth autonomic drug other spec place      |
| U208300 | [X]Int self poison oth/uns drug/med in sport/athletic area  |
| U208200 | [X]Int self poison oth/uns drug/med school/pub admin area   |
| U208y00 | [X]Int self poison oth/unsp drug/medic other spec place     |
| U20B300 | [X]Int self poison other gas/vapour in sport/athletic area  |
| U20By00 | [X]Int self poison other gas/vapour other spec place        |
| U20B200 | [X]Int self poison other gas/vapour school/pub admin area   |
| U20C300 | [X]Int self poison pesticide in sport/athletic area         |
| U20Cy00 | [X]Int self poison pesticide other spec place               |
| U20C200 | [X]Int self poison pesticide school/pub admin area          |
| U204300 | [X]Int self poison psychotropic drug in sport/athletic area |
| U204y00 | [X]Int self poison psychotropic drug other spec place       |
| U204200 | [X]Int self poison psychotropic drug school/pub admin area  |
| U202300 | [X]Int self poison sedative hypnotic in sport/athletic area |
| U202y00 | [X]Int self poison sedative hypnotic other spec place       |
| U202200 | [X]Int self poison sedative hypnotic school/pub admin area  |
| U20y300 | [X]Int self poison unspecif chemical in sport/athletic area |
| U20yy00 | [X]Int self poison unspecif chemical other spec place       |
| U20y200 | [X]Int self poison unspecif chemical school/pub admin area  |
| U209000 | [X]Int self poison/exposure to alcohol at home              |
| U209700 | [X]Int self poison/exposure to alcohol on farm              |
| U201000 | [X]Int self poison/exposure to antiepileptic at home        |
| U201700 | [X]Int self poison/exposure to antiepileptic on farm        |
| U203000 | [X]Int self poison/exposure to antiparkinson drug at home   |
| U203700 | [X]Int self poison/exposure to antiparkinson drug on farm   |
| U206000 | [X]Int self poison/exposure to hallucinogen at home         |
| U206700 | [X]Int self poison/exposure to hallucinogen on farm         |
| U205000 | [X]Int self poison/exposure to narcotic drug at home        |
| U205700 | [X]Int self poison/exposure to narcotic drug on farm        |
| U200000 | [X]Int self poison/exposure to nonopioid analgesic at home  |
| U200700 | [X]Int self poison/exposure to nonopioid analgesic on farm  |
| U207000 | [X]Int self poison/exposure to oth autonomic drug at home   |
| U207700 | [X]Int self poison/exposure to oth autonomic drug on farm   |
| U208700 | [X]Int self poison/exposure to oth/unsp drug/medic on farm  |
| U208000 | [X]Int self poison/exposure to oth/unsp drug/medicam home   |
| U20B000 | [X]Int self poison/exposure to other gas/vapour at home     |
| U20B700 | [X]Int self poison/exposure to other gas/vapour on farm     |
| U208.00 | [X]Int self poison/exposure to other/unspec                 |

drug/medicament

U20C000 [X]Int self poison/exposure to pesticide at home  
U20C700 [X]Int self poison/exposure to pesticide on farm  
U204000 [X]Int self poison/exposure to psychotropic drug at home  
U204700 [X]Int self poison/exposure to psychotropic drug on farm  
U202000 [X]Int self poison/exposure to sedative hypnotic at home  
U202700 [X]Int self poison/exposure to sedative hypnotic on farm  
U20y000 [X]Int self poison/exposure to unspecif chemical at home  
U20y700 [X]Int self poison/exposure to unspecif chemical on farm  
U209400 [X]Intent self pois alcohol in street/highway  
U209500 [X]Intent self pois alcohol trade/service area  
U201400 [X]Intent self pois antiepileptic in street/highway  
U201500 [X]Intent self pois antiepileptic trade/service area  
U203400 [X]Intent self pois antiparkinson drug in street/highway  
U203500 [X]Intent self pois antiparkinson drug trade/service area  
U206400 [X]Intent self pois hallucinogen in street/highway  
U206500 [X]Intent self pois hallucinogen trade/service area  
U205400 [X]Intent self pois narcotic drug in street/highway  
U205500 [X]Intent self pois narcotic drug trade/service area  
[X]Intent self pois nonopioid analges school/pub admin  
area  
U201200  
U200400 [X]Intent self pois nonopioid analgesic in street/highway  
U200500 [X]Intent self pois nonopioid analgesic trade/service area  
U20A000 [X]Intent self pois organ solvent,halogen hydrocarb, home  
U207400 [X]Intent self pois oth autonomic drug in street/highway  
U207500 [X]Intent self pois oth autonomic drug trade/service area  
U208400 [X]Intent self pois oth/unsp drug/medic in street/highway  
U208500 [X]Intent self pois oth/unsp drug/medic trade/service area  
U20B400 [X]Intent self pois other gas/vapour in street/highway  
U20B500 [X]Intent self pois other gas/vapour trade/service area  
U20C400 [X]Intent self pois pesticide in street/highway  
U20C500 [X]Intent self pois pesticide trade/service area  
U204400 [X]Intent self pois psychotropic drug in street/highway  
U204500 [X]Intent self pois psychotropic drug trade/service area  
U202400 [X]Intent self pois sedative hypnotic in street/highway  
U202500 [X]Intent self pois sedative hypnotic trade/service area  
U20y400 [X]Intent self pois unspecif chemical in street/highway  
U20y500 [X]Intent self pois unspecif chemical trade/service area  
U209100 [X]Intent self poison alcohol at res institut  
U209z00 [X]Intent self poison alcohol unspecif place  
U201100 [X]Intent self poison antiepileptic at res institut  
U201y00 [X]Intent self poison antiepileptic other spec place  
U201z00 [X]Intent self poison antiepileptic unspecif place  
U203100 [X]Intent self poison antiparkinson drug at res institut  
U203z00 [X]Intent self poison antiparkinson drug unspecif place  
U206100 [X]Intent self poison hallucinogen at res institut  
U206z00 [X]Intent self poison hallucinogen unspecif place  
U205100 [X]Intent self poison narcotic drug at res institut  
U205z00 [X]Intent self poison narcotic drug unspecif place  
U200100 [X]Intent self poison nonopioid analgesic at res institut  
U200z00 [X]Intent self poison nonopioid analgesic unspecif place

|         |                                                              |
|---------|--------------------------------------------------------------|
| U207100 | [X]Intent self poison oth autonomic drug at res institut     |
| U207z00 | [X]Intent self poison oth autonomic drug unspecif place      |
| U208z00 | [X]Intent self poison oth/unsp drug/medic unspecif place     |
| U208100 | [X]Intent self poison oth/unsp drug/medicam res institut     |
| U20B100 | [X]Intent self poison other gas/vapour at res institut       |
| U20Bz00 | [X]Intent self poison other gas/vapour unspecif place        |
| U20C100 | [X]Intent self poison pesticide at res institut              |
| U20Cz00 | [X]Intent self poison pesticide unspecif place               |
| U204100 | [X]Intent self poison psychotropic drug at res institut      |
| U204z00 | [X]Intent self poison psychotropic drug unspecif place       |
| U202100 | [X]Intent self poison sedative hypnotic at res institut      |
| U202z00 | [X]Intent self poison sedative hypnotic unspecif place       |
| U20y100 | [X]Intent self poison unspecif chemical at res institut      |
| U20yz00 | [X]Intent self poison unspecif chemical unspecif place       |
| U209.00 | [X]Intent self poison/exposure to alcohol                    |
| U201.00 | [X]Intent self poison/exposure to antiepileptic              |
| U203.00 | [X]Intent self poison/exposure to antiparkinson drug         |
| U206.00 | [X]Intent self poison/exposure to hallucinogen               |
| U205.00 | [X]Intent self poison/exposure to narcotic drug              |
| U200.00 | [X]Intent self poison/exposure to nonopioid analgesic        |
| U207.00 | [X]Intent self poison/exposure to oth autonomic drug         |
| U20B.00 | [X]Intent self poison/exposure to other gas/vapour           |
| U20C.00 | [X]Intent self poison/exposure to pesticide                  |
| U204.00 | [X]Intent self poison/exposure to psychotropic drug          |
| U202.00 | [X]Intent self poison/exposure to sedative hypnotic          |
| U20y.00 | [X]Intent self poison/exposure to unspecif chemical          |
| U20A.00 | [X]Intentional self poison organ solvent,halogen hydrocarb   |
|         | [X]Intentional self poisoning/exposure to noxious substances |
| U20..00 |                                                              |
| U204.12 | [X]Overdose - amitriptyline                                  |
| U202.18 | [X]Overdose - amylobarbitone                                 |
| U204.11 | [X]Overdose - antidepressant                                 |
| U200.13 | [X]Overdose - aspirin                                        |
| U202.17 | [X]Overdose - barbiturate                                    |
| U202.16 | [X]Overdose - benzodiazepine                                 |
| U202.12 | [X]Overdose - diazepam                                       |
| U202.14 | [X]Overdose - flurazepam                                     |
| U200.12 | [X]Overdose - ibuprofen                                      |
| U202.15 | [X]Overdose - nitrazepam                                     |
| U200.11 | [X]Overdose - paracetamol                                    |
| U202.11 | [X]Overdose - sleeping tabs                                  |
| U204.13 | [X]Overdose - SSRI                                           |
| U202.13 | [X]Overdose - temazepam                                      |
| U2...15 | [X]Para-suicide                                              |
| U400.00 | [X]Poisoning/exposure, ? intent, to nonopioid analgesic      |
| U402.00 | [X]Poisoning/exposure, ? intent, to sedative hypnotic        |
| U40y.00 | [X]Poisoning/exposure, ? intent, to unspecif chemical        |
| U2...13 | [X]Suicide                                                   |
| SL90000 | Amitriptyline poisoning                                      |
| 9947HN  | ASPHYXIA DUE HANGING                                         |
| 9947TR  | ASPHYXIA DUE STRANGULATION                                   |

|         |                                                              |
|---------|--------------------------------------------------------------|
| SN47z00 | Asphyxiation or strangulation NOS                            |
| 9651P   | ASPIRIN POISONING                                            |
| SL51000 | Aspirin poisoning                                            |
| TK...15 | Attempted suicide                                            |
| 9670A   | BARBITURATE OVERDOSE                                         |
| SL94.00 | Benzodiazepine poisoning                                     |
| TK...11 | Cause of overdose - deliberate                               |
| 9779DL  | DELIBERATE OVERDOSE (DRUG)                                   |
| ZX18.00 | Hanging self                                                 |
| 9651D   | OVERDOSE ASPIRIN                                             |
| 9779L   | OVERDOSE DRUG SUICIDAL                                       |
| 9779A   | OVERDOSE DRUG(S)                                             |
| SL...14 | Overdose of biological substance                             |
| SL...15 | Overdose of drug                                             |
| SL52100 | Paracetamol poisoning                                        |
| L3009P  | PARASUICIDE                                                  |
| TK...17 | Para-suicide                                                 |
| TK...13 | Poisoning - self-inflicted                                   |
| SL51.00 | Salicylate poisoning                                         |
| SL7..00 | Sedative and hypnotic drug poisoning                         |
| ZX1H.00 | Self-asphyxiation                                            |
| C110100 | Self-induced hyperinsulinism                                 |
| ZX1H200 | Self-suffocation                                             |
| 9947TS  | STRANGULATION                                                |
| 9947TA  | STRANGULATION ATTEMPTED                                      |
| SN47100 | Suffocation by strangulation                                 |
| 9779NA  | SUICIDAL OVERDOSE (DRUG)                                     |
| 3009D   | SUICIDE                                                      |
| TK3z.00 | Suicide + selfinflicted inj by hang/strangle/suffocate NOS   |
| TK3y.00 | Suicide + selfinflicted inj oth mean hang/strangle/suffocate |
| TKx0z00 | Suicide + selfinflicted inj-jump/lie before moving obj NOS   |
| TK3..00 | Suicide + selfinflicted injury by hang/strangulate/suffocate |
| TK31.00 | Suicide + selfinflicted injury by suffocation by plastic bag |
| TKx0.00 | Suicide + selfinflicted injury-jump/lie before moving object |
| TKx0000 | Suicide + selfinflicted injury-jumping before moving object  |
| TKx0100 | Suicide + selfinflicted injury-lying before moving object    |
| TK06.00 | Suicide + selfinflicted poisoning by agricultural chemical   |
| TK00.00 | Suicide + selfinflicted poisoning by analgesic/antipyretic   |
|         | Suicide + selfinflicted poisoning by arsenic + its           |
| TK08.00 | compounds                                                    |
| TK01.00 | Suicide + selfinflicted poisoning by barbiturates            |
| TK07.00 | Suicide + selfinflicted poisoning by corrosive/caustic subst |
| TK1z.00 | Suicide + selfinflicted poisoning by domestic gases NOS      |
| TK05.00 | Suicide + selfinflicted poisoning by drug or medicine NOS    |
| TK10.00 | Suicide + selfinflicted poisoning by gas via pipeline        |
|         | Suicide + selfinflicted poisoning by gases and vapours       |
| TK2z.00 | NOS                                                          |
| TK1..00 | Suicide + selfinflicted poisoning by gases in domestic use   |
| TK11.00 | Suicide + selfinflicted poisoning by liquified petrol gas    |
| TK20.00 | Suicide + selfinflicted poisoning by motor veh exhaust gas   |
| TK02.00 | Suicide + selfinflicted poisoning by oth sedatives/hypnotics |

|         |                                                              |
|---------|--------------------------------------------------------------|
| TK04.00 | Suicide + selfinflicted poisoning by other drugs/medicines   |
| TK2y.00 | Suicide + selfinflicted poisoning by other gases and vapours |
| TK0z.00 | Suicide + selfinflicted poisoning by solid/liquid subst NOS  |
| TK0..00 | Suicide + selfinflicted poisoning by solid/liquid substances |
| TK03.00 | Suicide + selfinflicted poisoning tranquilliser/psychotropic |
| TK...14 | Suicide and self harm                                        |
| TK01000 | Suicide and self inflicted injury by Amylobarbitone          |
| TK01100 | Suicide and self inflicted injury by Barbitone               |
| TK01z00 | Suicide and self inflicted injury by barbiturates            |
| TK01200 | Suicide and self inflicted injury by Butabarbitone           |
| TK01300 | Suicide and self inflicted injury by Pentabarbitone          |
| TK01400 | Suicide and self inflicted injury by Phenobarbitone          |
| TK01500 | Suicide and self inflicted injury by Quinalbarbitone         |
| TK...00 | Suicide and selfinflicted injury                             |
| TKx1.00 | Suicide and selfinflicted injury by burns or fire            |
| TKx5.00 | Suicide and selfinflicted injury by crashing motor vehicle   |
| TKx6.00 | Suicide and selfinflicted injury by crashing of aircraft     |
| TK60.00 | Suicide and selfinflicted injury by cutting                  |
| TK6..00 | Suicide and selfinflicted injury by cutting and stabbing     |
|         | Suicide and selfinflicted injury by cutting and stabbing NOS |
| TK6z.00 | NOS                                                          |
| TK4..00 | Suicide and selfinflicted injury by drowning                 |
| TKx4.00 | Suicide and selfinflicted injury by electrocution            |
| TK55.00 | Suicide and selfinflicted injury by explosives               |
| TKx3.00 | Suicide and selfinflicted injury by extremes of cold         |
| TK5..00 | Suicide and selfinflicted injury by firearms and explosives  |
| TK5z.00 | Suicide and selfinflicted injury by firearms/explosives NOS  |
| TK50.00 | Suicide and selfinflicted injury by handgun                  |
| TK30.00 | Suicide and selfinflicted injury by hanging                  |
| TK52.00 | Suicide and selfinflicted injury by hunting rifle            |
| TK7..00 | Suicide and selfinflicted injury by jumping from high place  |
| TK53.00 | Suicide and selfinflicted injury by military firearms        |
| TK54.00 | Suicide and selfinflicted injury by other firearm            |
| TKx..00 | Suicide and selfinflicted injury by other means              |
| TKxz.00 | Suicide and selfinflicted injury by other means NOS          |
| TKxy.00 | Suicide and selfinflicted injury by other specified means    |
| TKx2.00 | Suicide and selfinflicted injury by scald                    |
| TK51.00 | Suicide and selfinflicted injury by shotgun                  |
| TK61.00 | Suicide and selfinflicted injury by stabbing                 |
| TKx7.00 | Suicide and selfinflicted injury caustic subst, excl poison  |
| TKz..00 | Suicide and selfinflicted injury NOS                         |
|         | Suicide and selfinflicted poisoning by other carbon monoxide |
| TK21.00 | monoxide                                                     |
| TK1y.00 | Suicide and selfinflicted poisoning by other utility gas     |
| 3009C   | SUICIDE ATTEMPT                                              |
| 9947TC  | SUICIDE ATTEMPT STRANGULATION                                |
| TK7z.00 | Suicide+selfinflicted injury-jump from high place NOS        |
| TK72.00 | Suicide+selfinflicted injury-jump from natural sites         |
|         | Suicide+selfinflicted injury-jump from oth manmade structure |
| TK71.00 | structure                                                    |

TK70.00

Suicide+selfinflicted injury-jump from residential premises

**Table 2. Read and OXMIS coding for the identification of death in the GPRD**

| <b>Read/OXMIS Code</b> | <b>Read/OXMIS Term</b>                                                                                 |
|------------------------|--------------------------------------------------------------------------------------------------------|
| R212.00                | [D]Death less than 24 hours from onset of illness<br>[D]Death less than 24 hours from onset of illness |
| R212z00                | NOS                                                                                                    |
| R212000                | [D]Death, not instantaneous cause unknown                                                              |
| R212100                | [D]Died, with no sign of disease                                                                       |
| R213000                | [D]Found after death, unknown cause of death                                                           |
| R213100                | [D]Found dead                                                                                          |
| R211.00                | [D]Instantaneous death                                                                                 |
| R2...12                | [D]Mortality, cause unsure                                                                             |
| R21..00                | [D]Sudden death, cause unknown                                                                         |
| R21z.00                | [D]Sudden death, cause unknown NOS                                                                     |
| R213.00                | [D]Unattended death                                                                                    |
| R213z00                | [D]Unattended death NOS                                                                                |
| ZV68011                | [V]Issue of death certificate                                                                          |
| RyuC.00                | [X]Ill-defined and unknown causes of mortality                                                         |
| U3...13                | [X]Murder                                                                                              |
| RyuC200                | [X]Other ill-defined and unspecified causes of death                                                   |
| RyuC100                | [X]Other sudden death, cause unknown                                                                   |
| TGyz400                | Accidentally killed NOS                                                                                |
| 94...11                | Administration after pat. Died                                                                         |
| 9454                   | Ask for hosp death disch lett.                                                                         |
| 9452                   | Await hosp death disch letter                                                                          |
| 94B..00                | Cause of death                                                                                         |
| 947..00                | Cause of death clarif. SD17/18                                                                         |
| 941..11                | Certificate – death                                                                                    |
| 94B..11                | Condition fatal-cause of death                                                                         |
| L0010GP                | CORONER REFERRED TO                                                                                    |
| 9433                   | Coroner report - paid for                                                                              |
| 9431                   | Coroner report – requested                                                                             |
| 9432                   | Coroner report - sent off                                                                              |
| 9441                   | Coroner's PM report awaited                                                                            |
| 944Z.00                | Coroner's PM report NOS                                                                                |
| 9443                   | Coroner's PM report received                                                                           |
| 9442                   | Coroner's PM report requested                                                                          |
| 944..00                | Coroner's post-mortem report                                                                           |
| 9482                   | Crem. Form part B completed                                                                            |
| 9483                   | Crem. Form part C arranged                                                                             |
| 9484                   | Crem. Form part C completed                                                                            |
| 948..00                | Cremation certification                                                                                |
| 948Z.00                | Cremation certification NOS                                                                            |
| 949..11                | Dead - place patient died                                                                              |
| 9498                   | Dead on arrival at hospital                                                                            |



|         |                                                        |
|---------|--------------------------------------------------------|
| 22J..12 | Death                                                  |
| T140 F  | DEATH                                                  |
| 94...00 | Death administration                                   |
| 94Z..00 | Death administration NOS                               |
| 9681D   | DEATH ANAESTHETIC                                      |
| T140 FH | DEATH AT HOME                                          |
| 9411    | Death cert. Med A due                                  |
| 941Z.00 | Death cert. Med A NOS                                  |
| 9412    | Death cert. Med A signed                               |
| 941..00 | Death certificate form Med A                           |
| 8HG..11 | Death in hospital                                      |
| T140 FP | DEATH IN HOSPITAL                                      |
| 9451    | Death notif. From hospital                             |
| 946..00 | Death notif.- non.hosp source                          |
| 949..12 | Deceased - place patient died                          |
| T1400M  | DIED                                                   |
| 22J..13 | Died                                                   |
| 949..13 | Died - place patient died                              |
| 8HG..00 | Died in hospital                                       |
| 795 DR  | DROPPED DEAD                                           |
| 7962    | FOUND DEAD                                             |
| 9499    | Found dead at accident site                            |
| T0y0.00 | Found dead on railway right-of-way unspecified         |
|         | Found dead on railway unspecified - other spec person  |
| T0y0y00 |                                                        |
| T0y0100 | Found dead on railway unspecified - passenger          |
| T0y0200 | Found dead on railway unspecified - pedestrian         |
|         | Found dead on railway unspecified - unspecified person |
| T0y0z00 |                                                        |
| 9234    | FP22-death                                             |
| 945Z.00 | Hospital death disch. NOS                              |
| 945..00 | Hospital death discharge notif                         |
| T053.00 | Killed by rolling stock                                |
| T053y00 | Killed by rolling stock – other specified person       |
| T053100 | Killed by rolling stock – passenger                    |
| T053300 | Killed by rolling stock – pedal cyclist                |
| T053200 | Killed by rolling stock – pedestrian                   |
| T053000 | Killed by rolling stock – railway employee             |
| T053z00 | Killed by rolling stock – unspecified person           |
| 9413    | Med A given to family                                  |
| 9414    | Med A not signed-coroner case                          |
| 22J..00 | O/E – dead                                             |
| 22J..11 | O/E - dead - condition fatal                           |
| 22J2.00 | O/E - dead – expected                                  |
| 22J4.00 | O/E - dead - sudden death                              |
| 22J6.00 | O/E - dead - suspicious death                          |
| 22J3.00 | O/E - dead - unattended death                          |
| 22J1.00 | O/E - dead – unexpected                                |
| 22JZ.00 | O/E - dead NOS                                         |
| 2329    | O/E - death rattle                                     |
| 236..12 | O/E - respiratory death                                |

|         |                                    |
|---------|------------------------------------|
| 22J..14 | Patient died                       |
| T400    | PATIENT DIED                       |
| 949..00 | Patient died - to record place     |
| 9491    | Patient died at home               |
| 949A.00 | Patient died in hospice            |
| 9495    | Patient died in hospital           |
| 9493    | Patient died in nursing home       |
| 9492    | Patient died in part 3 accom.      |
| 949Z.00 | Patient died in place NOS          |
| 9497    | Patient died in publ.place NOS     |
| 9494    | Patient died in resid.inst.NOS     |
| 9496    | Patient died in street             |
| 9481    | Patient for cremation              |
| 949..14 | Place of death                     |
| 94C..00 | Post mortem report                 |
| L 917PM | POST MORTEM REPORT RECEIVED        |
| 94C0.00 | Post mortem report received        |
| 7L1M000 | Preoperative anaesthetic death     |
| 9453    | Receiv hosp death disch letter     |
| 94A..11 | Referral to coroner                |
| L0010GN | REFERRED TO CORONER                |
| 943..00 | Report for Coroner                 |
| 943Z.00 | Report for Coroner NOS             |
| L 917WD | REPORT RECEIVED FROM CORONER       |
| 947..11 | SD17 - cause of death clarif       |
| 947Z.00 | SD17/18 cause of death NOS         |
| 9472    | SD17/18 completed                  |
| 9471    | SD17/18 received-death clarif.     |
| 9473    | SD17/18-no details, returned       |
| 947..12 | SD18 - cause of death clarif       |
| 948..11 | Stat B,C and F cremation certs     |
| G575100 | Sudden cardiac death, so described |
| T4002   | SUDDEN DEATH                       |
| 795 N   | SUDDEN DEATH NONVIOLENT            |
| 94A..00 | Unexpected death-Coroner told      |
| 7963    | UNKNOWN CAUSE DEATH                |
| T4001   | VIOLENT DEATH                      |
